## CORRESPONDENCE

circulation for normal livers, leading to an impaired flow through this circuit.

In light of the deleterious effects of a hepatic congestion for the portal circulation emphasized by Heinrich and Kao, manipulation of the hepatic arterial flow might be of more limited interest in the reported case. First, the arterial buffer response,<sup>3</sup> which has been confirmed to exist in humans,<sup>4</sup> might have led to a relatively high hepatic arterial flow in this patient with a presumably highly reduced portal venous flow. Second, trying to increase portal inflow to the liver would imply acting on mesenteric blood flow and thus on systemic blood flow,<sup>5</sup> which can be limited in the described clinical situation.

Concerning the atrial fibrillation, we agree on the comment raising the necessity to control the ventricular rate. However, cardioversion was judged dangerous at the acute phase of the decompensation and was considered as a consequence rather than the cause of the right heart failure. Accordingly, normal sinus rhythm spontaneously recovered after the hemodynamic improvement, suggesting that the atrial fibrillation resulted from rather than in hemodynamic dysfunction. Two years after this acute episode, the patient is still in good hemodynamic condition and has been removed from the heart transplantation list.

In conclusion, we believe that the observed beneficial effect of inhaled nitric oxide in this patient was the consequence of a significant decrease in hepatic venous pressure while mean arterial pressure was maintained. For the hospitals that "do not have the proper permission or setup for nitric oxide administration," we could advocate the use of a pharmacologic combination therapy to achieve these goals, although such a combination might be less effective or more difficult to use.

**Claire Gatecel, M.D.**

Instructor

**Alexandre Mebazaa, M.D., Ph.D.**

Assistant Professor

**Robert Kong, M.B., B.S., F.R.C.A.**

Instructor

**Nathalie Guinard, M.D.**

Instructor

**Nathalie Kermarrec, M.D.**

Resident

**Joaquim Matéo, M.D.**

Instructor

**Didier Payen, M.D., Ph.D.**

Professor

Department of Anesthesiology and Critical Care

Hôpital Lariboisière

2, rue, Ambroise Paré

75010 Paris, France

## References

1. Gatecel C, Mebazaa A, Kong R, Guinard N, Kermarrec N, Mateo J, Payen D: Inhaled nitric oxide improves hepatic tissue oxygenation in right ventricular failure: Value of hepatic venous oxygen saturation monitoring. *ANESTHESIOLOGY* 82:588-590, 1995
2. Ayuse T, Brienza N, O'Donnel CP, Rototham JL: Pressure-flow analysis of portal vein and hepatic artery interactions in porcine liver. *Am J Physiol* 267:H1233-H1242, 1994
3. Lauth W, Greenway C: Conceptual review of the hepatic vascular bed. *Hepatology* 7:952-963, 1987
4. Payen D, Fratacci M, Dupuy P, Gatecel C, Vigouroux C, Ozier Y, Houssin D, Chapuis Y: Portal and hepatic arterial blood flow measurements of human transplanted liver by implanted Doppler probes: Interest for early complications and nutrition. *Surgery* 107:417-427, 1990
5. Pastor C, Payen D: Effect of modifying nitric oxide pathway on liver circulation response in a rabbit endotoxin shock model. *Shock* 2:196-202, 1994

(Accepted for publication April 13, 1995.)

## Respiratory Arrest after Second Dose of Intrathecal Sufentanil

*To the Editor:*—We describe a case of respiratory arrest after the administration of a second dose of intrathecal sufentanil during labor.

A 34-yr-old gravida 4, para 1, abortion 2 woman was admitted to York Hospital at 8 AM in active labor. She was 5'6" tall and weighed 156 lb at term. Her medical history was unremarkable. On examination she was noted to have a single fetus in vertex presentation. Fetal heart monitoring by abdominal doppler revealed a reassuring pattern at a rate of 120 beats/min.

At 9 AM, at 5 cm dilatation, she requested labor analgesia for which 12.5 µg intrathecal sufentanil was administered with good result. The procedure was accomplished without difficulty at the L3-L4

interspace via a 24-G Sprotte needle. Sufentanil was diluted with cerebrospinal fluid (CSF) to a total volume of 2 ml. Vital signs were recorded every 5 min for the first 15 min after the sufentanil. Pulse and blood pressure remained stable, as did the fetal heart trace.

Four hours after the first dose of sufentanil, the patient reported return of painful contractions. She received another 12.5 µg sufentanil intrathecally via the same interspace as before. The second spinal procedure was uneventful, and the patient again reported excellent analgesia. Twenty minutes later, the spouse noted the patient was unresponsive to verbal commands. He immediately called the nurse to the labor room, who noted the patient to be in respiratory arrest.

## CORRESPONDENCE

While awaiting arrival of the emergency team, the nurse administered 100% O<sub>2</sub> by a self-inflating device. On arrival, the emergency team noted no spontaneous respirations, pinpoint pupils, pulse 78 beats/min, and blood pressure 118/60 mmHg. She was unresponsive to verbal commands and vigorous shaking. Fetal heart rate (FHR) was 60 beats/min from a baseline of 130. Naloxone (0.4 mg) was given as an intravenous bolus to which the patient responded immediately with prompt awakening. Seven minutes after naloxone, FHR increased to 150–160 beats/min. The rest of her labor course was unremarkable.

At 4:20 PM, the patient underwent a normal spontaneous vaginal delivery of an 8-lb, 1-oz male infant with Apgar scores of 9 and 10 at 1 and 5 min, respectively.

Sufentanil is a highly lipophilic opioid with a strong affinity for the opioid receptors. Its lipophilicity is advantageous in limiting its mean residence time in CSF, thereby minimizing potential side effects, such as delayed respiratory depression.<sup>1,2</sup> However, early respiratory depression is of concern. Recently, a case report appeared that described respiratory depression after a single dose of intrathecal sufentanil in a laboring parturient.<sup>3</sup>

The exact mechanism by which the respiratory arrest occurred in our patient is not clear. According to the study by Hansdottir *et al.*, intrathecal sufentanil has a mean residence time of 0.9 h in CSF but almost 7 h in plasma.<sup>1</sup> They pointed out that, after repeated doses of intrathecal sufentanil, there was a theoretical risk of accumulation of this drug in plasma but not in CSF. This may explain the respiratory arrest seen in our patient. The second dose of sufentanil was given approximately 3 h, 40 min after the first dose, at a time when the plasma concentration of the first dose, insufficient by itself, may have been augmented by the second dose to that above the threshold for respiratory arrest. However, cephalad migration of sufentanil in the CSF, leading to central respiratory depression, cannot be ruled out. D'Angelo *et al.*, from their observation of the cephalad extent of sensory changes resulting from intrathecal sufentanil administered at the lumbar spinal level, cautioned about the potential for respiratory depression.<sup>4</sup>

There are few data regarding the optimal dose of intrathecal sufentanil for labor analgesia, for either the initial bolus or repeat doses.

\* Van Decar T, Callicot R, Jones R, Herman N: Determination of a dose response curve for intrathecal sufentanil in labor, 26th Annual Meeting, Society of Obstetric Anesthesia and Perinatology, May 1994.

Anesthesiology  
83:232–233, 1995  
© 1995 American Society of Anesthesiologists, Inc.  
Lippincott-Raven Publishers

## Sevoflurane, Fluoride Ion, and Renal Toxicity

**To the Editor:**—In a recent editorial regarding a study by Kharasch *et al.*,<sup>1</sup> Brown<sup>2</sup> claims that sevoflurane is "biotransformed in a quantitative fashion similar to enflurane." How "similar" are they? In patients with renal impairment, sevoflurane administration resulted

An abstract addressing this issue suggests that there may be no advantage to using doses in excess of 7.5 µg intrathecal sufentanil.<sup>3</sup> Whether such a dose would reduce the likelihood of early respiratory depression remains to be investigated.

We wish to emphasize that patients receiving intrathecal sufentanil be monitored closely after each dose. As suggested by Hays and Palmer, this should include checking the respiratory rate every 15 min for the first hour after injection and every 30 min for the next 2 h.<sup>3</sup> It may be prudent to note the cephalad spread of sensory changes after each dose. Appropriate resuscitation equipment and personnel must be immediately available. Furthermore, dose-response studies are necessary to establish the optimal dosage schedule for single injection and continuous intrathecal sufentanil for labor analgesia.

**Michael N. Baker, M.D.**  
Director of Anesthesia  
Department of Anesthesia  
York Hospital  
York, Maine 03909

**Mukesh C. Sarna, M.D., F.R.C.A., F.F.A.R.C.S.(I)**  
Associate Director of Obstetric Anesthesia  
Department of Anesthesia and Critical Care  
330 Brookline Avenue  
Beth Israel Hospital  
Boston, Massachusetts 02115

## References

1. Hansdottir V, Hedner T, Woestenborghs R, Nordberg G: The CSF and plasma pharmacokinetics of sufentanil after intrathecal administration. *ANESTHESIOLOGY* 74:264–269, 1991
2. Van Der Auwera D, Verborgh C, Camu F: Analgesic and cardiorespiratory effects of epidural sufentanil and morphine in humans. *Anesth Analg* 66:999–1003, 1987
3. Hays RL, Palmer CM: Respiratory depression after intrathecal sufentanil during labor. *ANESTHESIOLOGY* 81:511–512, 1994
4. D'Angelo R, Anderson MT, Philip J, Eisenach JC: Intrathecal sufentanil compared to epidural bupivacaine for labor analgesia. *ANESTHESIOLOGY* 80:1209–1215, 1994

(Accepted for publication April 18, 1995.)

in average serum fluoride concentrations 85% greater than those given enflurane.<sup>3</sup> It has been reported that 8.1% of adult patients given sevoflurane had a serum fluoride concentration greater than 50 µM.<sup>4</sup> What is the corresponding percentage for enflurane? Brown's con-

tion that sevoflurane is not biotransformed simply is not tenable.

Also, nothing was mentioned in the abstract of the biotransformation by cytochrome P-450, namely hexafluoroisopropanol, a product that eventually results from the metabolism of sevoflurane. Sevoflurane is metabolized to hexafluoroisopropanol and desflurane in that it has a hydroxyl group rather than a difluoromethyl group, and desflurane necessarily undergoes a different metabolic pathway.

The frenetic push toward convective clearance of HEP plus the fact that sevoflurane is an old anesthetic that has been heavily biotransformed in the past, to report methoxyflurane P-450-dependent toxicity in clinical practice in 1995? Seven years ago, methoxyflurane was given with the knowledge that it had become apparent? How long did it take to realize the existence of halothane-related hepatotoxicity? Of these toxicities? No. Our recent strategy is to use agents that undergo the lowest possible metabolic attack that makes sense.

The notion that somehow serum fluoride levels in nephrotoxicity, to which Brown<sup>2</sup> alludes, is so much importance, obscures a more important issue: this drug, which soon may be given to patients, is heavily biotransformed to "shibboleths and jigsaw puzzles" that are not resolved.

Kharasch *et al.*<sup>1</sup> point out that in their study, they cite the example that decreases methoxyflurane P-450-dependent release, diminishes renal toxicity. The authors attempted to dissociate serum fluoride from renal toxicity, by concluding that concentrations nor duration of fluoride ion were nonselectively to all anesthetics to which they imply that there may be some metabolic consequence of methoxyflurane.

Anesthesiology  
83:233–234, 1995  
© 1995 American Society of Anesthesiologists  
Lippincott-Raven Publishers

**In Reply:**—My editorial<sup>1</sup> was focused on the article by Kharasch *et al.* concerning compound A, hexafluoroisopropanol, a product of sevoflurane, both political and scientific. The editorial was strictly confined to the fact that local renal production and hepatic clearance of fluoride ion may be of greater importance than measured by the plasma fluoride ion. And Baker's contention, neither n-
